# Supplementary material for: Functional characterization of thermotolerant microbial consortium for lignocellulolytic enzymes with central role of Firmicutes in rice straw depolymerization
Source: PubMed Central journal article supplement (PMC7862241; doi:10.1038/s41598-021-82163-x), 2021-02-04
Supplement: 41598_2021_82163_MOESM4_ESM.pdf [file 41598_2021_82163_MOESM4_ESM.pdf]

**Title:** Functional characterization of thermotolerant microbial consortium for lignocellulolytic enzymes with central role of firmicutes in rice straw depolymerisation

**Authors**

\*Parmeshwar V. Gavande, E.mail: [parmesh.gavande9@gmail.com](mailto:parmesh.gavande9@gmail.com)

\*Arijita Basak, E. mail: [basakarijita.biotech@gmail.com](mailto:basakarijita.biotech@gmail.com)

Subhajit Sen, E.mail: [subhajit252@gmail.com](mailto:subhajit252@gmail.com)

Khusboo Lepcha, E.mail: [khusboo.microbiology@gmail.com](mailto:khusboo.microbiology@gmail.com)

Nensina Murmu, E.mail: [nensinamur75@gmail.com](mailto:nensinamur75@gmail.com)

Vijeta Rai, E. mail: [vijetaarpan@gmail.com](mailto:vijetaarpan@gmail.com)

Deepika Mazumdar, E.mail: [deepikamazumdar@gmail.com](mailto:deepikamazumdar@gmail.com)

Shyama Prasad Saha, E. mail: [shyamaprasad.saha3@gmail.com](mailto:shyamaprasad.saha3@gmail.com)

Vaskar Das, E.mail: [dasvaskar303@gmail.com](mailto:dasvaskar303@gmail.com)

@Shilpi Ghosh, E.mail: [ghosshilpi@gmail.com](mailto:ghosshilpi@gmail.com); [shilpighosh@nbu.ac.in](mailto:shilpighosh@nbu.ac.in)

**Affiliation:** Department of Biotechnology, University of North Bengal, Raja Rammohunpur, P.O.-  
NBU, Siliguri, West Bengal, India, PIN-734013

\*Contributed equally

@**Correspondence:** Department of Biotechnology, University of North Bengal, Raja Rammohunpur,  
Siliguri, West Bengal, India, PIN-734013

E. mail: [ghosshilpi@gmail.com](mailto:ghosshilpi@gmail.com)

[shilpighosh@nbu.ac.in](mailto:shilpighosh@nbu.ac.in)

## Genera

|                       |                   |
|-----------------------|-------------------|
| Pseudoclostridium     | 2809 bacteria     |
| Chelatococcus         | 2129 bacteria     |
| Thermoanaerobacterium | 1953 bacteria     |
| Algoriphagus          | 1379 bacteria     |
| Bacillus              | 522 bacteria      |
| Pseudoxanthomonas     | 512 bacteria      |
| Geobacillus           | 471 bacteria      |
| Halomonas             | 435 bacteria      |
| Aeribacillus          | 431 bacteria      |
| Symbiobacterium       | 234 bacteria      |
| Aneurinibacillus      | 194 bacteria      |
| Caldibacillus         | 193 bacteria      |
| Hungateiclostridium   | 73 bacteria       |
| Vibrio                | 70 bacteria       |
| Virgibacillus         | 67 bacteria       |
| Escherichia           | 63 bacteria       |
| Salmonella            | 57 bacteria       |
| Micrococcus           | 53 Actinobacteria |
| Clostridium           | 52 bacteria       |
| Tepidimicrobium       | 49 bacteria       |
| Microvirga            | 41 bacteria       |
| Parageobacillus       | 34 bacteria       |
| Halobacillus          | 33 bacteria       |
| Echinicola            | 29 bacteria       |
| Anoxybacillus         | 28 bacteria       |
| Halorubrum            | 28 archaea        |
| Paenibacillus         | 26 bacteria       |
| Stenotrophomonas      | 25 bacteria       |
| Deinococcus           | 22 bacteria       |
| Bradyrhizobium        | 20 bacteria       |
| Bosea                 | 19 bacteria       |
| Keratinibaculum       | 19 bacteria       |
| Corynebacterium       | 18 Actinobacteria |
| Thermoanaerobacter    | 18 bacteria       |
| Methylobacterium      | 16 bacteria       |
| Rufibacter            | 16 bacteria       |
| Flavobacterium        | 15 bacteria       |
| Pseudomonas           | 15 bacteria       |
| Alcaligenes           | 14 bacteria       |
| Aquiflexum            | 14 bacteria       |
| Herbinix              | 13 bacteria       |
| Cyclobacterium        | 12 bacteria       |
| Ralstonia             | 12 bacteria       |
| Xanthomonas           | 12 bacteria       |
| Belliella             | 11 bacteria       |
| Paracoccus            | 11 bacteria       |
| Streptomyces          | 11 Actinobacteria |
| Chryseobacterium      | 10 bacteria       |
| Shigella              | 10 bacteria       |

|                   |                  |
|-------------------|------------------|
| Thermobacillus    | 10 bacteria      |
| Brachybacterium   | 9 Actinobacteria |
| Haloplanus        | 9 archaea        |
| Microbacterium    | 9 Actinobacteria |
| Thermoclostridium | 9 bacteria       |
| Chitinophaga      | 8 bacteria       |
| Desulfotomaculum  | 8 bacteria       |
| Mesorhizobium     | 8 bacteria       |
| Methylocaldum     | 8 bacteria       |
| Caenibacillus     | 7 bacteria       |
| Caldanaerobius    | 7 bacteria       |
| Dehalococcoides   | 7 bacteria       |
| Kocuria           | 7 Actinobacteria |
| Luteimonas        | 7 bacteria       |
| Natronomonas      | 7 archaea        |
| Sphingomonas      | 7 bacteria       |
| Thermomonas       | 7 bacteria       |
| Tuberibacillus    | 7 bacteria       |
| Agathobaculum     | 6 bacteria       |
| Citrobacter       | 6 bacteria       |
| Cupriavidus       | 6 bacteria       |
| Listeria          | 6 bacteria       |
| Lutispora         | 6 bacteria       |
| Natronolimnobius  | 6 archaea        |
| Silanimonas       | 6 bacteria       |
| Spirosoma         | 6 bacteria       |
| Thermoacetogenium | 6 bacteria       |
| Achromobacter     | 5 bacteria       |
| Aquamicrobium     | 5 bacteria       |
| Arthrobacter      | 5 Actinobacteria |
| Brevibacillus     | 5 bacteria       |
| Cecemia           | 5 bacteria       |
| Eubacterium       | 5 bacteria       |
| Mahella           | 5 bacteria       |
| Mariniradius      | 5 bacteria       |
| Massilia          | 5 bacteria       |
| Oceanobacillus    | 5 bacteria       |
| Rhizobium         | 5 bacteria       |
| Roseomonas        | 5 bacteria       |
| Runella           | 5 bacteria       |
| Ureibacillus      | 5 bacteria       |
| Acinetobacter     | 4 bacteria       |
| Acuticoccus       | 4 bacteria       |
| Amphibacillus     | 4 bacteria       |
| Anaerobranca      | 4 bacteria       |
| Azorhizobium      | 4 bacteria       |
| Azospirillum      | 4 bacteria       |
| Bordetella        | 4 bacteria       |
| Burkholderia      | 4 bacteria       |
| Enterococcus      | 4 bacteria       |

|                   |                  |
|-------------------|------------------|
| Fabibacter        | 4 bacteria       |
| Halalkaliarchaeum | 4 archaea        |
| Halapricum        | 4 archaea        |
| Hymenobacter      | 4 bacteria       |
| Inquilinus        | 4 bacteria       |
| Lysobacter        | 4 bacteria       |
| Mongoliibacter    | 4 bacteria       |
| Natronococcus     | 4 archaea        |
| Owenweeksia       | 4 bacteria       |
| Pedobacter        | 4 bacteria       |
| Phreatobacter     | 4 bacteria       |
| Pontibacter       | 4 bacteria       |
| Schlegelella      | 4 bacteria       |
| Sinorhizobium     | 4 bacteria       |
| Sphingobacterium  | 4 bacteria       |
| Sporanaerobacter  | 4 bacteria       |
| Staphylococcus    | 4 bacteria       |
| Sulfuritortus     | 4 bacteria       |
| Variovorax        | 4 bacteria       |
| Aminobacter       | 3 bacteria       |
| Anaerosalibacter  | 3 bacteria       |
| Aureimonas        | 3 bacteria       |
| Bacteroides       | 3 bacteria       |
| Bittarella        | 3 bacteria       |
| Caloramator       | 3 bacteria       |
| Calorimonas       | 3 bacteria       |
| Cohnella          | 3 bacteria       |
| Cutibacterium     | 3 Actinobacteria |
| Desulfitibacter   | 3 bacteria       |
| Desulfofarcimen   | 3 bacteria       |
| Dyadobacter       | 3 bacteria       |
| Flavisolibacter   | 3 bacteria       |
| Geobacter         | 3 bacteria       |
| Geosporobacter    | 3 bacteria       |
| Haloarcula        | 3 archaea        |
| Halobiforma       | 3 archaea        |
| Halohasta         | 3 archaea        |
| Halopiger         | 3 archaea        |
| Lysinibacillus    | 3 bacteria       |
| Muricauda         | 3 bacteria       |
| Mycolicibacterium | 3 Actinobacteria |
| Nocardia          | 3 Actinobacteria |
| Ochrobactrum      | 3 bacteria       |
| Paraburkholderia  | 3 bacteria       |
| Paraflavitalea    | 3 bacteria       |
| Shinella          | 3 bacteria       |
| Spiribacter       | 3 bacteria       |
| Tepidibacter      | 3 bacteria       |
| Tepidiphilus      | 3 bacteria       |
| Thalassobacillus  | 3 bacteria       |

|                     |                  |
|---------------------|------------------|
| Thermoactinomyces   | 3 bacteria       |
| Thermolongibacillus | 3 bacteria       |
| Vulcanibacterium    | 3 bacteria       |
| Xanthobacter        | 3 bacteria       |
| Zunongwangja        | 3 bacteria       |
| Acidovorax          | 2 bacteria       |
| Aeromonas           | 2 bacteria       |
| Aerosticca          | 2 bacteria       |
| Afifella            | 2 bacteria       |
| Alkaliphilus        | 2 bacteria       |
| Amycolatopsis       | 2 Actinobacteria |
| Anaeromyxobacter    | 2 bacteria       |
| Aquabacter          | 2 bacteria       |
| Arenibacter         | 2 bacteria       |
| Arenimonas          | 2 bacteria       |
| Azoarcus            | 2 bacteria       |
| Azotobacter         | 2 bacteria       |
| Bavariicoccus       | 2 bacteria       |
| Bernardetia         | 2 bacteria       |
| Bifidobacterium     | 2 Actinobacteria |
| Brevibacterium      | 2 Actinobacteria |
| Caldimonas          | 2 bacteria       |
| Camelimonas         | 2 bacteria       |
| Campylobacter       | 2 bacteria       |
| Caulobacter         | 2 bacteria       |
| Chromohalobacter    | 2 bacteria       |
| Collinsella         | 2 Actinobacteria |
| Cytophaga           | 2 bacteria       |
| Defluviitalea       | 2 bacteria       |
| Dokdonella          | 2 bacteria       |
| Dokdonia            | 2 bacteria       |
| Ectothiorhodospira  | 2 bacteria       |
| Ensifer             | 2 bacteria       |
| Epidermidibacterium | 2 Actinobacteria |
| Fusobacterium       | 2 bacteria       |
| Gottschalkia        | 2 bacteria       |
| Haemophilus         | 2 bacteria       |
| Halobacterium       | 2 archaea        |
| Halobellus          | 2 archaea        |
| Halomicrobium       | 2 archaea        |
| Halopenitus         | 2 archaea        |
| Haloprofundus       | 2 archaea        |
| Haloquadratum       | 2 archaea        |
| Halorhabdus         | 2 archaea        |
| Halorussus          | 2 archaea        |
| Halostella          | 2 archaea        |
| Hydrogenophaga      | 2 bacteria       |
| Klebsiella          | 2 bacteria       |
| Kordia              | 2 bacteria       |
| Lactobacillus       | 2 bacteria       |

|                      |                  |
|----------------------|------------------|
| Mucilaginibacter     | 2 bacteria       |
| Mycobacterium        | 2 Actinobacteria |
| Natrialba            | 2 archaea        |
| Natrinema            | 2 archaea        |
| Nitratireductor      | 2 bacteria       |
| Nocardioides         | 2 Actinobacteria |
| Nostoc               | 2 bacteria       |
| Pannonibacter        | 2 bacteria       |
| Pantoea              | 2 bacteria       |
| Paramaledivibacter   | 2 bacteria       |
| Peptoniphilus        | 2 bacteria       |
| Petrotoga            | 2 bacteria       |
| Pseudarcicella       | 2 bacteria       |
| Pseudorhodoferax     | 2 bacteria       |
| Quasibacillus        | 2 bacteria       |
| Rhodanobacter        | 2 bacteria       |
| Rhodopseudomonas     | 2 bacteria       |
| Roseovarius          | 2 bacteria       |
| Rubrivivax           | 2 bacteria       |
| Ruminococcus         | 2 bacteria       |
| Salarchaeum          | 2 archaea        |
| Sediminicola         | 2 bacteria       |
| Sphingopyxis         | 2 bacteria       |
| Stappia              | 2 bacteria       |
| Streptacidiphilus    | 2 Actinobacteria |
| Streptococcus        | 2 bacteria       |
| Sulfurivermis        | 2 bacteria       |
| Syntrophomonas       | 2 bacteria       |
| Tepidanaerobacter    | 2 bacteria       |
| Thermaerobacter      | 2 bacteria       |
| Thioalkalivibrio     | 2 bacteria       |
| Vogesella            | 2 bacteria       |
| Westiellopsis        | 2 bacteria       |
| Zhizhongheella       | 2 bacteria       |
| Actinobaculum        | 1 Actinobacteria |
| Actinomadura         | 1 Actinobacteria |
| Actinopolyspora      | 1 Actinobacteria |
| Agrobacterium        | 1 bacteria       |
| Aidingimonas         | 1 bacteria       |
| Alcanivorax          | 1 bacteria       |
| Algibacter           | 1 bacteria       |
| Alicyclobacillus     | 1 bacteria       |
| Alkalibacillus       | 1 bacteria       |
| Altererythrobacter   | 1 bacteria       |
| Anaerobacterium      | 1 bacteria       |
| Anaerocolumna        | 1 bacteria       |
| Anaerophaga          | 1 bacteria       |
| Anaerosacchariphilus | 1 bacteria       |
| Andreprevotia        | 1 bacteria       |
| Aphanothece          | 1 bacteria       |

|                      |                  |
|----------------------|------------------|
| Aquimarina           | 1 bacteria       |
| Arachidicoccus       | 1 bacteria       |
| Aulosira             | 1 bacteria       |
| Aurantimonas         | 1 bacteria       |
| Auraticoccus         | 1 Actinobacteria |
| Baekduia             | 1 Actinobacteria |
| Beggiatoa            | 1 bacteria       |
| Belnapia             | 1 bacteria       |
| Borrelia             | 1 bacteria       |
| Brachyspira          | 1 bacteria       |
| Brockia              | 1 bacteria       |
| Caballeronia         | 1 bacteria       |
| Caldalkalibacillus   | 1 bacteria       |
| Caldicoprobacter     | 1 bacteria       |
| Caloranaerobacter    | 1 bacteria       |
| Calothrix            | 1 bacteria       |
| Caproiciproducens    | 1 bacteria       |
| Carboxydotherrmus    | 1 bacteria       |
| Castellaniella       | 1 bacteria       |
| Coprococcus          | 1 bacteria       |
| Cellulophaga         | 1 bacteria       |
| Cellulosilyticum     | 1 bacteria       |
| Cerasibacillus       | 1 bacteria       |
| Chelativorans        | 1 bacteria       |
| Chlorobaculum        | 1 bacteria       |
| Chromobacterium      | 1 bacteria       |
| Clostridiisalibacter | 1 bacteria       |
| Clostridioides       | 1 bacteria       |
| Colwellia            | 1 bacteria       |
| Cronobacter          | 1 bacteria       |
| Cyanobium            | 1 bacteria       |
| Cystobacter          | 1 bacteria       |
| Dechlorosoma         | 1 bacteria       |
| Defluviitoga         | 1 bacteria       |
| Dehalobacterium      | 1 bacteria       |
| Delftia              | 1 bacteria       |
| Desnuesiella         | 1 bacteria       |
| Desulfotomaculum     | 1 bacteria       |
| Desulfofustis        | 1 bacteria       |
| Desulfohalotomaculum | 1 bacteria       |
| Desulfosporosinus    | 1 bacteria       |
| Duncaniella          | 1 bacteria       |
| Dyella               | 1 bacteria       |
| Edaphobacter         | 1 bacteria       |
| Egicoccus            | 1 Actinobacteria |
| Eisenibacter         | 1 bacteria       |
| Elioraea             | 1 bacteria       |
| Empedobacter         | 1 bacteria       |
| Enterovirga          | 1 bacteria       |
| Ethanoligenens       | 1 bacteria       |

|                      |                  |
|----------------------|------------------|
| Euzebyella           | 1 bacteria       |
| Faecalibacterium     | 1 bacteria       |
| Falsochromobacterium | 1 bacteria       |
| Ferruginivarius      | 1 bacteria       |
| Fervidicella         | 1 bacteria       |
| Fervidicola          | 1 bacteria       |
| Flavipsychrobacter   | 1 bacteria       |
| Fluviicola           | 1 bacteria       |
| Fonticella           | 1 bacteria       |
| Fontimonas           | 1 bacteria       |
| Frankia              | 1 Actinobacteria |
| Fransicella          | 1 bacteria       |
| Fulvivirga           | 1 bacteria       |
| Gaetbulibacter       | 1 bacteria       |
| Gemmatirosa          | 1 bacteria       |
| Geomonas             | 1 bacteria       |
| Gracilibacillus      | 1 bacteria       |
| Gramella             | 1 bacteria       |
| Granulibacter        | 1 bacteria       |
| Halalkalicoccus      | 1 archaea        |
| Halanaeroarchaeum    | 1 archaea        |
| Haliscomenobacter    | 1 bacteria       |
| Haloarchaeobius      | 1 archaea        |
| Halococcus           | 1 archaea        |
| Halodesulfurarchaeum | 1 archaea        |
| Haloferax            | 1 archaea        |
| Halogeometricum      | 1 archaea        |
| Halogranum           | 1 archaea        |
| Halomarina           | 1 archaea        |
| Halomicroarcula      | 1 archaea        |
| Halonotius           | 1 archaea        |
| Haloterrigena        | 1 archaea        |
| Hartmannibacter      | 1 bacteria       |
| Heliobacterium       | 1 bacteria       |
| Herbaspirillum       | 1 bacteria       |
| Herminiimonas        | 1 bacteria       |
| Hespellia            | 1 bacteria       |
| Hoeflea              | 1 bacteria       |
| Ideonella            | 1 bacteria       |
| Indibacter           | 1 bacteria       |
| Isoptericola         | 1 Actinobacteria |
| Izhakiella           | 1 bacteria       |
| Kineosphaera         | 1 Actinobacteria |
| Kribbia              | 1 Actinobacteria |
| Labilibaculum        | 1 bacteria       |
| Laceyella            | 1 bacteria       |
| Lawsonibacter        | 1 bacteria       |
| Leclercia            | 1 bacteria       |
| Legionella           | 1 bacteria       |
| Lentimicrobium       | 1 bacteria       |



|                    |                  |
|--------------------|------------------|
| Leptobacterium     | 1 bacteria       |
| Leptospirillum     | 1 bacteria       |
| Lyngbya            | 1 bacteria       |
| Macrococcus        | 1 bacteria       |
| Magnetospirillum   | 1 bacteria       |
| Mangrovibacter     | 1 bacteria       |
| Mannheimia         | 1 bacteria       |
| Maribacter         | 1 bacteria       |
| Marichromatium     | 1 bacteria       |
| Marinagarivorans   | 1 bacteria       |
| Marinirhabdus      | 1 bacteria       |
| Marinitoga         | 1 bacteria       |
| Marinococcus       | 1 bacteria       |
| Marispirochaeta    | 1 bacteria       |
| Martelella         | 1 bacteria       |
| Massilibacterium   | 1 bacteria       |
| Methanoregula      | 1 archaea        |
| Methylacidophilum  | 1 bacteria       |
| Methylococcus      | 1 bacteria       |
| Methylocystis      | 1 bacteria       |
| Methylomusa        | 1 bacteria       |
| Methylorubrum      | 1 bacteria       |
| Methyloversatilis  | 1 bacteria       |
| Microbispora       | 1 Actinobacteria |
| Microcystis        | 1 bacteria       |
| Microlunatus       | 1 Actinobacteria |
| Micromonospora     | 1 Actinobacteria |
| Minicystis         | 1 bacteria       |
| Moheibacter        | 1 bacteria       |
| Mongoliimonas      | 1 bacteria       |
| Myroides           | 1 bacteria       |
| Natronobacterium   | 1 archaea        |
| Natronorubrum      | 1 archaea        |
| Neisseria          | 1 bacteria       |
| Neorhizobium       | 1 bacteria       |
| Nibribacter        | 1 bacteria       |
| Nitratifactor      | 1 bacteria       |
| Nitrococcus        | 1 bacteria       |
| Nitrosococcus      | 1 bacteria       |
| Nonomurea          | 1 Actinobacteria |
| Novibacillus       | 1 bacteria       |
| Noviherbaspirillum | 1 bacteria       |
| Oceanithermus      | 1 bacteria       |
| Opitutus           | 1 bacteria       |
| Ornithinibacillus  | 1 bacteria       |
| Paenisporosarcina  | 1 bacteria       |
| Paludifilum        | 1 bacteria       |
| Pandora            | 1 bacteria       |
| Paraferrimonas     | 1 bacteria       |
| Paramesorhizobium  | 1 bacteria       |

|                    |            |
|--------------------|------------|
| Pararhizobium      | 1 bacteria |
| Phyllobacterium    | 1 bacteria |
| Planococcus        | 1 bacteria |
| Planomicrobium     | 1 bacteria |
| Pleomorphomonas    | 1 bacteria |
| Polaromonas        | 1 bacteria |
| Polymorphum        | 1 bacteria |
| Polynucleobacter   | 1 bacteria |
| Pontibacillus      | 1 bacteria |
| Pradoshia          | 1 bacteria |
| Prevotella         | 1 bacteria |
| Prochlorococcus    | 1 bacteria |
| Prosthecochloris   | 1 bacteria |
| Proteiniborus      | 1 bacteria |
| Proteus            | 1 bacteria |
| Pseudoalteromonas  | 1 bacteria |
| Pseudobacteroides  | 1 bacteria |
| Pseudoceanicola    | 1 bacteria |
| Pseudorhizobium    | 1 bacteria |
| Ramlibacter        | 1 bacteria |
| Raoultella         | 1 bacteria |
| Reyranella         | 1 bacteria |
| Rhodobacter        | 1 bacteria |
| Rhodoblastus       | 1 bacteria |
| Rhodocytophaga     | 1 bacteria |
| Rhodoligotrophos   | 1 bacteria |
| Rhodonellum        | 1 bacteria |
| Rhodoplanes        | 1 bacteria |
| Rhodovulum         | 1 bacteria |
| Robiginitalea      | 1 bacteria |
| Roseateles         | 1 bacteria |
| Roseivirga         | 1 bacteria |
| Rubidibacter       | 1 bacteria |
| Rubrimonas         | 1 bacteria |
| Rubrivorax         | 1 bacteria |
| Saccharibacillus   | 1 bacteria |
| Saccharothrix      | 1 bacteria |
| Salicibibacter     | 1 bacteria |
| Salinarimonas      | 1 bacteria |
| Salinibacter       | 1 bacteria |
| Salinimicrobium    | 1 bacteria |
| Salinispira        | 1 bacteria |
| Salipaludibacillus | 1 bacteria |
| Salipiger          | 1 bacteria |
| Sandaracinus       | 1 bacteria |
| Saprospira         | 1 bacteria |
| Schleiferia        | 1 bacteria |
| Scytonema          | 1 bacteria |
| Selenomonas        | 1 bacteria |
| Seonamhaeicola     | 1 bacteria |

|                      |                  |
|----------------------|------------------|
| Serinicoccus         | 1 Actinobacteria |
| Serpentinomonas      | 1 bacteria       |
| Serratia             | 1 bacteria       |
| Shewanella           | 1 bacteria       |
| Singulisphaera       | 1 bacteria       |
| Sinohodobacter       | 1 bacteria       |
| Solirubrobacter      | 1 Actinobacteria |
| Sorangium            | 1 bacteria       |
| Sphingobium          | 1 bacteria       |
| Stanieria            | 1 bacteria       |
| Staphylospora        | 1 bacteria       |
| Stella               | 1 bacteria       |
| Streptosporangium    | 1 Actinobacteria |
| Tepidicaulis         | 1 bacteria       |
| Tepidicella          | 1 bacteria       |
| Tepidimonas          | 1 bacteria       |
| Thalassococcus       | 1 bacteria       |
| Thauera              | 1 bacteria       |
| Thermococcus         | 1 archaea        |
| Thermohalobacter     | 1 bacteria       |
| Thermosediminibacter | 1 bacteria       |
| Thermovenabulum      | 1 bacteria       |
| Thioclava            | 1 bacteria       |
| Tissierella          | 1 bacteria       |
| Tistrella            | 1 bacteria       |
| Treponema            | 1 bacteria       |
| Trinickia            | 1 bacteria       |
| Ureaplasma           | 1 bacteria       |
| Vallitalea           | 1 bacteria       |
| Verticiella          | 1 bacteria       |
| Winogradskyella      | 1 bacteria       |
| Xylanibacterium      | 1 Actinobacteria |
| Zobellella           | 1 bacteria       |
| Zobiella             | 1 bacteria       |

|                                           |                   |
|-------------------------------------------|-------------------|
| Total genus                               | 13191             |
| No significant similarity                 | 2243 unclassified |
| deleted (contamination)                   | 29 unclassified   |
| Uncultured firmicutes bacterium contig    | 1 unclassified    |
| Uncultured bacterium clone                | 1 unclassified    |
| Uncultured bacterium                      | 3 unclassified    |
| Uncultured firmicutes bacterium contig_31 | 1 unclassified    |
| Uncultured prokaryote clone               | 1 unclassified    |
| Bacterium 0.1xD8-71                       | 1 unclassified    |
| bacterium 1xD42-11                        | 1 unclassified    |
| Bacterium 1xD42-62                        | 1 unclassified    |
| bacterium D16-76                          | 3 unclassified    |
| bacterium M00.F.Ca.ET.177.01.1.1          | 1 unclassified    |
| Halophilic archaeon                       | 2 unclassified    |
| Candidatus Pelagibacter sp                | 1 unclassified    |

|                                    |                 |
|------------------------------------|-----------------|
| PREDICTED: Cicer arietinum         | 1 unclassified  |
| PREDICTED: Cucumis melo            | 1 unclassified  |
| PREDICTED: Drosophila erecta       | 1 unclassified  |
| PREDICTED: Ethioostoma             | 1 unclassified  |
| PREDICTED: Lactuca sativa          | 1 unclassified  |
| PREDICTED: Lingula anatina         | 1 unclassified  |
| PREDICTED:Loxodonta africana       | 1 unclassified  |
| PREDICTED:Panicum hali             | 1 unclassified  |
| PREDICTED: Pteropus alecto         | 1 unclassified  |
| PREDICTED: Stomoxys calcitrans     | 1 unclassified  |
| PREDICTED: Vanessa tameamea        | 1 unclassified  |
| Bacillaceae bacterium              | 17 unclassified |
| Balneolaceae bacterium             | 1 unclassified  |
| Chromatiaceae bacterium            | 1 unclassified  |
| Clostridiales bacterium            | 1 unclassified  |
| Corynebacteriaceae bacterium       | 5 unclassified  |
| Cytophagales bacterium             | 1 unclassified  |
| Enterobacteriaceae bacterium       | 1 unclassified  |
| Enterococcaceae bacterium          | 1 unclassified  |
| Erysipelotrichaceae bacterium      | 1 unclassified  |
| Flavobacteriaceae bacterium        | 1 unclassified  |
| Gemmataceae bacterium              | 1 unclassified  |
| Phycisphaerae bacterium            | 1 unclassified  |
| Planctomyecetes bacterium          | 5 unclassified  |
| Prolixibacteraceae bacterium       | 1 unclassified  |
| Rhodanobacteriaceae bacterium      | 1 unclassified  |
| Rhodocyclaceae bacterium           | 5 unclassified  |
| Ruminococcaceae bacterium          | 2 unclassified  |
| Sterolibacteriaceae bacterium      | 2 unclassified  |
| Streptococcaceae bacterium         | 1 unclassified  |
| Thermoanaerobacteraceae bacterium  | 4 unclassified  |
| Halobacteriaceae archaeon          | 4 unclassified  |
| Aquila chrysaetos chrysaetos       | 1 eagle         |
| Aphantopus                         | 1 insect        |
| Mus                                | 2 rat           |
| Caligus                            | 1 sea lice      |
| Homo sapiens                       | 2 man           |
| Arabia                             | 1 not found     |
| Cyphellophora                      | 1 fungi         |
| Cryptococcus                       | 1 fungi         |
| Eremothecium                       | 1 fungi         |
| Exophiala                          | 1 fungi         |
| Lachancea                          | 2 fungi         |
| Sciurus                            | 1 fungi         |
| Streptopelia                       | 1 fungi         |
| Ustilago                           | 1 fungi         |
| Candida glabrata                   | 55 fungi        |
| Cladophialophora                   | 1 fungi         |
| Oryza sativa Indica group cultivar | 3 rice          |
| Gossypium                          | 1 cotton        |

|               |         |
|---------------|---------|
| Triticum      | 2 wheat |
| Vigna         | 1 plant |
| Digitaria     | 1 plant |
| Cyprinus      | 1 fish  |
| Salmo         | 1 fish  |
| Strongyloides | 1 worm  |
